# Supplementary material
Source: Elsevier journal article supplement (https://www.sciencedirect.com/science/article/pii/S2530064421000171)
Supplement: mmc1 [file S2530064421000171:mmc1.xlsx]

## Sheet: Hoja1
Complex	Species	Model performance
		AUC/ROC	partial-ROC
L. anomalus	L. anomalus_1980	0.867	1.435
L. fitzingerii	L. casamiquelai	0.784	1.925
	L. cuyanus	0.934	1.842
	L. fitzingerii	0.794	1.852
	L. mapuche	0.905	1.956
	L. fitzingerii_1980	0.744	1.691
P. antofagastensis	P. denotatus	0.802	1.594
	P. antofagastensis_1980	0.916	1.756
P. palluma	P. palluma	0.871	1.596
	P. palluma_1980	0.848	1.372
P. patagonicus	P. ceii	0.98	1.966
	P. patagonicus_1980	0.916	1.526
