# Supplementary material
Source: Elsevier journal article supplement (https://www.sciencedirect.com/science/article/pii/S2530064421000171)
Supplement: mmc2 [file S2530064421000171:mmc2.docx]

**Appendix 1:** Location records for each current species within each complex. And bibliography from which records were extracted.

**Database of records.**

| **Genus** | **Complex** | **Species** | **Longitude** | **Latitude** |
| --- | --- | --- | --- | --- |
| Liolaemus | Anomalus | *L. anomalus* | -66.7464 | -30.0888 |
| Liolaemus | Anomalus | *L. anomalus* | -67.8776 | -29.8502 |
| Liolaemus | Anomalus | *L. anomalus* | -67.9947 | -29.7854 |
| Liolaemus | Anomalus | *L. anomalus* | -67.9371 | -30.0682 |
| Liolaemus | Anomalus | *L. anomalus* | -67.8507 | -30.1735 |
| Liolaemus | Anomalus | *L. anomalus* | -67.852 | -30.1752 |
| Liolaemus | Anomalus | *L. anomalus* | -68.0013 | -30.1273 |
| Liolaemus | Anomalus | *L. anomalus* | -67.9895 | -30.1268 |
| Liolaemus | Anomalus | *L. pipanco* | -66.2429 | -27.8506 |
| Liolaemus | Anomalus | *L. pipanco* | -66.2831 | -27.8392 |
| Liolaemus | Anomalus | *L. pipanco* | -66.2747 | -27.902 |
| Liolaemus | Anomalus | *L. pipanco* | -66.288 | -27.9425 |
| Liolaemus | Anomalus | *L. pipanco* | -66.2715 | -27.8135 |
| Liolaemus | Anomalus | *L. ditadai* | -64.6692 | -29.853 |
| Liolaemus | Anomalus | *L. ditadai* | -64.6679 | -29.8612 |
| Liolaemus | Anomalus | *L. ditadai* | -64.9314 | -29.4968 |
| Liolaemus | Anomalus | *L. ditadai* | -63.9778 | -28.8931 |
| Liolaemus | Anomalus | *L. ditadai* | -64.6673 | -29.8552 |
| Liolaemus | Anomalus | *L. acostai* | -68.4809 | -31.3424 |
| Liolaemus | Anomalus | *L. acostai* | -68.4824 | -31.3438 |
| Liolaemus | Anomalus | *L. acostai* | -68.4805 | -31.3436 |
| Liolaemus | Anomalus | *L. acostai* | -68.4662 | -31.3229 |
| Liolaemus | Anomalus | *L. acostai* | -68.468 | -31.3252 |
| Liolaemus | Anomalus | *L. acostai* | -68.4675 | -31.3271 |
| Liolaemus | Anomalus | *L. acostai* | -68.4725 | -31.3283 |
| Liolaemus | Anomalus | *L. acostai* | -68.4636 | -31.3196 |
| Liolaemus | Anomalus | *L. acostai* | -68.4684 | -31.3188 |
| Liolaemus | Anomalus | *L. acostai* | -68.4794 | -31.3377 |
| Liolaemus | Anomalus | *L. acostai* | -68.4738 | -31.3355 |
| Liolaemus | Anomalus | *L. acostai* | -68.4837 | -31.3447 |
| Liolaemus | Anomalus | *L. acostai* | -68.485 | -31.3411 |
| Liolaemus | Anomalus | *L. acostai* | -68.4731 | -31.3334 |
| Liolaemus | Anomalus | *L. acostai* | -68.6428 | -31.2456 |
| Liolaemus | Anomalus | *L. acostai* | -68.6356 | -30.6511 |
| Liolaemus | Anomalus | *L. millcayac* | -67.0463 | -31.4257 |
| Liolaemus | Anomalus | *L. millcayac* | -67.035 | -31.4193 |
| Liolaemus | Anomalus | *L. millcayac* | -67.0414 | -31.4293 |
| Liolaemus | Anomalus | *L. millcayac* | -67.0535 | -31.4334 |
| Liolaemus | Anomalus | *L. millcayac* | -68.6671 | -32.7149 |
| Liolaemus | Anomalus | *L. millcayac* | -68.5261 | -32.3348 |
| Liolaemus | Anomalus | *L. millcayac* | -68.5376 | -32.3323 |
| Liolaemus | Anomalus | *L. millcayac* | -68.5131 | -32.3356 |
| Liolaemus | Anomalus | *L. millcayac* | -68.6682 | -32.7157 |
| Liolaemus | Fitzingerii | *L. casamiquelai* | -68.9148 | -40.0438 |
| Liolaemus | Fitzingerii | *L. casamiquelai* | -68.9233 | -40.0496 |
| Liolaemus | Fitzingerii | *L. casamiquelai* | -68.3667 | -40.4334 |
| Liolaemus | Fitzingerii | *L. casamiquelai* | -68.3857 | -40.4434 |
| Liolaemus | Fitzingerii | *L. casamiquelai* | -68.3724 | -40.4436 |
| Liolaemus | Fitzingerii | *L. casamiquelai* | -68.3948 | -40.4472 |
| Liolaemus | Fitzingerii | *L. casamiquelai* | -68.3814 | -40.4475 |
| Liolaemus | Fitzingerii | *L. casamiquelai* | -68.3689 | -40.4482 |
| Liolaemus | Fitzingerii | *L. casamiquelai* | -68.377 | -40.4491 |
| Liolaemus | Fitzingerii | *L. casamiquelai* | -68.3995 | -40.4519 |
| Liolaemus | Fitzingerii | *L. casamiquelai* | -68.4083 | -40.4522 |
| Liolaemus | Fitzingerii | *L. casamiquelai* | -68.3882 | -40.4538 |
| Liolaemus | Fitzingerii | *L. casamiquelai* | -68.4047 | -40.454 |
| Liolaemus | Fitzingerii | *L. casamiquelai* | -67.6197 | -40.5486 |
| Liolaemus | Fitzingerii | *L. casamiquelai* | -69.2833 | -40.8833 |
| Liolaemus | Fitzingerii | *L. casamiquelai* | -68.3667 | -41.05 |
| Liolaemus | Fitzingerii | *L. casamiquelai* | -68.4984 | -41.1449 |
| Liolaemus | Fitzingerii | *L. casamiquelai* | -68.4908 | -41.1457 |
| Liolaemus | Fitzingerii | *L. casamiquelai* | -68.5 | -41.15 |
| Liolaemus | Fitzingerii | *L. casamiquelai* | -68.4864 | -41.1556 |
| Liolaemus | Fitzingerii | *L. casamiquelai* | -68.5036 | -41.1568 |
| Liolaemus | Fitzingerii | *L. casamiquelai* | -68.5027 | -41.1652 |
| Liolaemus | Fitzingerii | *L. casamiquelai* | -68.491 | -41.172 |
| Liolaemus | Fitzingerii | *L. casamiquelai* | -68.5183 | -41.1769 |
| Liolaemus | Fitzingerii | *L. casamiquelai* | -68.5338 | -41.1889 |
| Liolaemus | Fitzingerii | *L. casamiquelai* | -68.5399 | -41.192 |
| Liolaemus | Fitzingerii | *L. casamiquelai* | -69.3953 | -41.2139 |
| Liolaemus | Fitzingerii | *L. casamiquelai* | -69.4 | -41.2167 |
| Liolaemus | Fitzingerii | *L. casamiquelai* | -69.4071 | -41.2184 |
| Liolaemus | Fitzingerii | *L. casamiquelai* | -69.405 | -41.2284 |
| Liolaemus | Fitzingerii | *L. casamiquelai* | -69.4103 | -41.2303 |
| Liolaemus | Fitzingerii | *L. casamiquelai* | -69.4155 | -41.2311 |
| Liolaemus | Fitzingerii | *L. casamiquelai* | -69.5833 | -41.3 |
| Liolaemus | Fitzingerii | *L. casamiquelai* | -69.2859 | -41.3044 |
| Liolaemus | Fitzingerii | *L. casamiquelai* | -69.2904 | -41.3069 |
| Liolaemus | Fitzingerii | *L. casamiquelai* | -69.4723 | -41.3319 |
| Liolaemus | Fitzingerii | *L. casamiquelai* | -69.4706 | -41.3337 |
| Liolaemus | Fitzingerii | *L. cuyanus* | -67.7005 | -27.2302 |
| Liolaemus | Fitzingerii | *L. cuyanus* | -67.7565 | -27.2405 |
| Liolaemus | Fitzingerii | *L. cuyanus* | -67.7092 | -27.4153 |
| Liolaemus | Fitzingerii | *L. cuyanus* | -67.5716 | -27.4203 |
| Liolaemus | Fitzingerii | *L. cuyanus* | -67.6574 | -27.4804 |
| Liolaemus | Fitzingerii | *L. cuyanus* | -67.647 | -27.4858 |
| Liolaemus | Fitzingerii | *L. cuyanus* | -67.5961 | -27.5125 |
| Liolaemus | Fitzingerii | *L. cuyanus* | -67.622 | -27.5668 |
| Liolaemus | Fitzingerii | *L. cuyanus* | -67.6196 | -27.5756 |
| Liolaemus | Fitzingerii | *L. cuyanus* | -67.6097 | -27.593 |
| Liolaemus | Fitzingerii | *L. cuyanus* | -67.656 | -27.7763 |
| Liolaemus | Fitzingerii | *L. cuyanus* | -67.6644 | -27.7998 |
| Liolaemus | Fitzingerii | *L. cuyanus* | -66.2458 | -27.811 |
| Liolaemus | Fitzingerii | *L. cuyanus* | -66.2758 | -27.8134 |
| Liolaemus | Fitzingerii | *L. cuyanus* | -66.2439 | -27.8233 |
| Liolaemus | Fitzingerii | *L. cuyanus* | -66.2497 | -27.8284 |
| Liolaemus | Fitzingerii | *L. cuyanus* | -66.2061 | -27.8319 |
| Liolaemus | Fitzingerii | *L. cuyanus* | -66.2125 | -28.1208 |
| Liolaemus | Fitzingerii | *L. cuyanus* | -66.2182 | -28.1615 |
| Liolaemus | Fitzingerii | *L. cuyanus* | -66.2121 | -28.1747 |
| Liolaemus | Fitzingerii | *L. cuyanus* | -67.483 | -28.2005 |
| Liolaemus | Fitzingerii | *L. cuyanus* | -67.4826 | -28.2075 |
| Liolaemus | Fitzingerii | *L. cuyanus* | -67.4166 | -28.25 |
| Liolaemus | Fitzingerii | *L. cuyanus* | -67.4175 | -28.2675 |
| Liolaemus | Fitzingerii | *L. cuyanus* | -66.8423 | -28.5041 |
| Liolaemus | Fitzingerii | *L. cuyanus* | -67.3444 | -28.5192 |
| Liolaemus | Fitzingerii | *L. cuyanus* | -67.3527 | -28.5237 |
| Liolaemus | Fitzingerii | *L. cuyanus* | -67.3616 | -28.5299 |
| Liolaemus | Fitzingerii | *L. cuyanus* | -67.362 | -28.5314 |
| Liolaemus | Fitzingerii | *L. cuyanus* | -67.3798 | -28.54 |
| Liolaemus | Fitzingerii | *L. cuyanus* | -66.8141 | -28.5536 |
| Liolaemus | Fitzingerii | *L. cuyanus* | -66.8138 | -28.5542 |
| Liolaemus | Fitzingerii | *L. cuyanus* | -66.8033 | -28.5764 |
| Liolaemus | Fitzingerii | *L. cuyanus* | -66.7833 | -28.7 |
| Liolaemus | Fitzingerii | *L. cuyanus* | -66.8339 | -28.7604 |
| Liolaemus | Fitzingerii | *L. cuyanus* | -67.3956 | -28.8259 |
| Liolaemus | Fitzingerii | *L. cuyanus* | -66.9367 | -28.8439 |
| Liolaemus | Fitzingerii | *L. cuyanus* | -67.3493 | -28.8498 |
| Liolaemus | Fitzingerii | *L. cuyanus* | -67.3503 | -28.8518 |
| Liolaemus | Fitzingerii | *L. cuyanus* | -68.5084 | -29.5317 |
| Liolaemus | Fitzingerii | *L. cuyanus* | -68.0153 | -29.7296 |
| Liolaemus | Fitzingerii | *L. cuyanus* | -68.0171 | -29.7366 |
| Liolaemus | Fitzingerii | *L. cuyanus* | -67.9991 | -29.7836 |
| Liolaemus | Fitzingerii | *L. cuyanus* | -67.9092 | -29.8458 |
| Liolaemus | Fitzingerii | *L. cuyanus* | -67.8556 | -29.9242 |
| Liolaemus | Fitzingerii | *L. cuyanus* | -67.8652 | -29.9296 |
| Liolaemus | Fitzingerii | *L. cuyanus* | -67.9371 | -30.0682 |
| Liolaemus | Fitzingerii | *L. cuyanus* | -67.8507 | -30.1735 |
| Liolaemus | Fitzingerii | *L. cuyanus* | -67.7143 | -30.1743 |
| Liolaemus | Fitzingerii | *L. cuyanus* | -67.7018 | -30.1863 |
| Liolaemus | Fitzingerii | *L. cuyanus* | -68.6365 | -30.6442 |
| Liolaemus | Fitzingerii | *L. cuyanus* | -68.6356 | -30.6511 |
| Liolaemus | Fitzingerii | *L. cuyanus* | -68.6229 | -30.8247 |
| Liolaemus | Fitzingerii | *L. cuyanus* | -68.6375 | -31.2491 |
| Liolaemus | Fitzingerii | *L. cuyanus* | -67.1125 | -31.4524 |
| Liolaemus | Fitzingerii | *L. cuyanus* | -67.6571 | -31.5886 |
| Liolaemus | Fitzingerii | *L. cuyanus* | -67.6974 | -31.6013 |
| Liolaemus | Fitzingerii | *L. cuyanus* | -67.7082 | -31.6387 |
| Liolaemus | Fitzingerii | *L. cuyanus* | -68.2824 | -31.6556 |
| Liolaemus | Fitzingerii | *L. cuyanus* | -65.8379 | -31.8591 |
| Liolaemus | Fitzingerii | *L. cuyanus* | -67.6691 | -32.2081 |
| Liolaemus | Fitzingerii | *L. cuyanus* | -67.8568 | -32.2732 |
| Liolaemus | Fitzingerii | *L. cuyanus* | -68.0544 | -32.3825 |
| Liolaemus | Fitzingerii | *L. cuyanus* | -68.7785 | -32.8147 |
| Liolaemus | Fitzingerii | *L. cuyanus* | -67.1833 | -37.65 |
| Liolaemus | Fitzingerii | *L. cuyanus* | -67.1112 | -37.8132 |
| Liolaemus | Fitzingerii | *L. cuyanus* | -67.3497 | -38.0984 |
| Liolaemus | Fitzingerii | *L. cuyanus* | -70.0527 | -43.7097 |
| Liolaemus | Fitzingerii | *L. fitzingerii* | -65.4138 | -43.9145 |
| Liolaemus | Fitzingerii | *L. fitzingerii* | -65.4034 | -43.9163 |
| Liolaemus | Fitzingerii | *L. fitzingerii* | -65.4 | -43.9167 |
| Liolaemus | Fitzingerii | *L. fitzingerii* | -65.4167 | -43.9167 |
| Liolaemus | Fitzingerii | *L. fitzingerii* | -65.4042 | -43.918 |
| Liolaemus | Fitzingerii | *L. fitzingerii* | -65.478 | -43.9681 |
| Liolaemus | Fitzingerii | *L. fitzingerii* | -65.4746 | -43.9684 |
| Liolaemus | Fitzingerii | *L. fitzingerii* | -65.4258 | -43.9849 |
| Liolaemus | Fitzingerii | *L. fitzingerii* | -65.4613 | -44.0251 |
| Liolaemus | Fitzingerii | *L. fitzingerii* | -65.4613 | -44.0251 |
| Liolaemus | Fitzingerii | *L. fitzingerii* | -65.5122 | -44.0313 |
| Liolaemus | Fitzingerii | *L. fitzingerii* | -65.45 | -44.0833 |
| Liolaemus | Fitzingerii | *L. fitzingerii* | -66.15 | -44.2167 |
| Liolaemus | Fitzingerii | *L. fitzingerii* | -65.325 | -44.2579 |
| Liolaemus | Fitzingerii | *L. fitzingerii* | -66.1512 | -44.2653 |
| Liolaemus | Fitzingerii | *L. fitzingerii* | -66.1512 | -44.2653 |
| Liolaemus | Fitzingerii | *L. fitzingerii* | -66.1556 | -44.266 |
| Liolaemus | Fitzingerii | *L. fitzingerii* | -66.2801 | -44.3661 |
| Liolaemus | Fitzingerii | *L. fitzingerii* | -70.4016 | -44.5337 |
| Liolaemus | Fitzingerii | *L. fitzingerii* | -70.0282 | -44.9971 |
| Liolaemus | Fitzingerii | *L. fitzingerii* | -67.0865 | -45.0579 |
| Liolaemus | Fitzingerii | *L. fitzingerii* | -69.7146 | -45.4613 |
| Liolaemus | Fitzingerii | *L. fitzingerii* | -69.8977 | -45.4639 |
| Liolaemus | Fitzingerii | *L. fitzingerii* | -69.309 | -45.4938 |
| Liolaemus | Fitzingerii | *L. fitzingerii* | -69.3072 | -45.4951 |
| Liolaemus | Fitzingerii | *L. fitzingerii* | -69.0686 | -45.5842 |
| Liolaemus | Fitzingerii | *L. fitzingerii* | -69.2772 | -45.6013 |
| Liolaemus | Fitzingerii | *L. fitzingerii* | -69.2696 | -45.6023 |
| Liolaemus | Fitzingerii | *L. fitzingerii* | -69.2696 | -45.6034 |
| Liolaemus | Fitzingerii | *L. fitzingerii* | -69.2613 | -45.6055 |
| Liolaemus | Fitzingerii | *L. fitzingerii* | -70.2696 | -45.7281 |
| Liolaemus | Fitzingerii | *L. fitzingerii* | -70.982 | -45.737 |
| Liolaemus | Fitzingerii | *L. fitzingerii* | -70.16 | -45.7593 |
| Liolaemus | Fitzingerii | *L. fitzingerii* | -67.4989 | -45.791 |
| Liolaemus | Fitzingerii | *L. fitzingerii* | -69.07 | -45.7958 |
| Liolaemus | Fitzingerii | *L. fitzingerii* | -67.7188 | -45.8865 |
| Liolaemus | Fitzingerii | *L. fitzingerii* | -67.594 | -46.0207 |
| Liolaemus | Fitzingerii | *L. fitzingerii* | -70.0362 | -46.4844 |
| Liolaemus | Fitzingerii | *L. fitzingerii* | -70.7661 | -46.5217 |
| Liolaemus | Fitzingerii | *L. fitzingerii* | -67.4388 | -46.5612 |
| Liolaemus | Fitzingerii | *L. fitzingerii* | -68.6824 | -46.5624 |
| Liolaemus | Fitzingerii | *L. fitzingerii* | -71.1978 | -46.6012 |
| Liolaemus | Fitzingerii | *L. fitzingerii* | -68.177 | -46.7313 |
| Liolaemus | Fitzingerii | *L. fitzingerii* | -68.4725 | -47.1012 |
| Liolaemus | Fitzingerii | *L. fitzingerii* | -68.4732 | -47.1067 |
| Liolaemus | Fitzingerii | *L. fitzingerii* | -67.2551 | -47.1987 |
| Liolaemus | Fitzingerii | *L. fitzingerii* | -68.5613 | -47.2636 |
| Liolaemus | Fitzingerii | *L. fitzingerii* | -66.0634 | -47.6561 |
| Liolaemus | Fitzingerii | *L. fitzingerii* | -65.9528 | -47.6742 |
| Liolaemus | Fitzingerii | *L. fitzingerii* | -65.9436 | -47.6755 |
| Liolaemus | Fitzingerii | *L. fitzingerii* | -65.9466 | -47.6757 |
| Liolaemus | Fitzingerii | *L. fitzingerii* | -65.9403 | -47.6765 |
| Liolaemus | Fitzingerii | *L. fitzingerii* | -65.9503 | -47.677 |
| Liolaemus | Fitzingerii | *L. fitzingerii* | -65.9435 | -47.6781 |
| Liolaemus | Fitzingerii | *L. fitzingerii* | -66.0097 | -47.6938 |
| Liolaemus | Fitzingerii | *L. fitzingerii* | -67.6243 | -48.0815 |
| Liolaemus | Fitzingerii | *L. fitzingerii* | -67.6512 | -48.1435 |
| Liolaemus | Fitzingerii | *L. fitzingerii* | -67.6775 | -48.2039 |
| Liolaemus | Fitzingerii | *L. fitzingerii* | -67.7389 | -48.5504 |
| Liolaemus | Fitzingerii | *L. fitzingerii* | -67.7433 | -48.5535 |
| Liolaemus | Fitzingerii | *L. fitzingerii* | -67.7368 | -48.5555 |
| Liolaemus | Fitzingerii | *L. fitzingerii* | -67.7454 | -48.5603 |
| Liolaemus | Fitzingerii | *L. fitzingerii* | -67.7471 | -48.5631 |
| Liolaemus | Fitzingerii | *L. fitzingerii* | -67.7332 | -48.5648 |
| Liolaemus | Fitzingerii | *L. fitzingerii* | -71.051 | -48.9077 |
| Liolaemus | Fitzingerii | *L. fitzingerii* | -71.0523 | -48.9084 |
| Liolaemus | Fitzingerii | *L. fitzingerii* | -71.0541 | -48.91 |
| Liolaemus | Fitzingerii | *L. fitzingerii* | -71.0577 | -48.9104 |
| Liolaemus | Fitzingerii | *L. fitzingerii* | -71.0515 | -48.913 |
| Liolaemus | Fitzingerii | *L. fitzingerii* | -71.0448 | -48.9141 |
| Liolaemus | Fitzingerii | *L. fitzingerii* | -71.0566 | -48.915 |
| Liolaemus | Fitzingerii | *L. fitzingerii* | -71.0637 | -48.9154 |
| Liolaemus | Fitzingerii | *L. fitzingerii* | -71.0575 | -48.9162 |
| Liolaemus | Fitzingerii | *L. fitzingerii* | -71.0651 | -48.9163 |
| Liolaemus | Fitzingerii | *L. fitzingerii* | -71.0518 | -48.9178 |
| Liolaemus | Fitzingerii | *L. fitzingerii* | -71.0639 | -48.9183 |
| Liolaemus | Fitzingerii | *L. fitzingerii* | -71.067 | -48.9222 |
| Liolaemus | Fitzingerii | *L. fitzingerii* | -71.0684 | -48.9258 |
| Liolaemus | Fitzingerii | *L. fitzingerii* | -71.074 | -48.9325 |
| Liolaemus | Fitzingerii | *L. mapuche* | -69.3907 | -38.6079 |
| Liolaemus | Fitzingerii | *L. mapuche* | -69.3967 | -38.6156 |
| Liolaemus | Fitzingerii | *L. mapuche* | -69.3523 | -38.6207 |
| Liolaemus | Fitzingerii | *L. mapuche* | -69.3771 | -38.6211 |
| Liolaemus | Fitzingerii | *L. mapuche* | -69.3858 | -38.6301 |
| Liolaemus | Fitzingerii | *L. mapuche* | -69.3588 | -38.6322 |
| Liolaemus | Fitzingerii | *L. mapuche* | -69.3474 | -38.6337 |
| Liolaemus | Fitzingerii | *L. mapuche* | -69.3422 | -38.646 |
| Liolaemus | Fitzingerii | *L. mapuche* | -69.3803 | -38.647 |
| Liolaemus | Fitzingerii | *L. mapuche* | -69.2898 | -38.6472 |
| Liolaemus | Fitzingerii | *L. mapuche* | -69.3699 | -38.6531 |
| Liolaemus | Fitzingerii | *L. mapuche* | -69.3173 | -38.6892 |
| Liolaemus | Fitzingerii | *L. mapuche* | -70.3148 | -38.7381 |
| Liolaemus | Fitzingerii | *L. mapuche* | -70.3115 | -38.7405 |
| Liolaemus | Fitzingerii | *L. mapuche* | -69.7376 | -38.8558 |
| Liolaemus | Fitzingerii | *L. mapuche* | -69.7415 | -38.8591 |
| Liolaemus | Fitzingerii | *L. mapuche* | -69.7392 | -38.8625 |
| Liolaemus | Fitzingerii | *L. mapuche* | -69.7568 | -38.8647 |
| Liolaemus | Fitzingerii | *L. mapuche* | -69.7437 | -38.8648 |
| Liolaemus | Fitzingerii | *L. mapuche* | -69.7544 | -38.8757 |
| Liolaemus | Fitzingerii | *L. mapuche* | -69.7583 | -38.8795 |
| Liolaemus | Fitzingerii | *L. mapuche* | -69.7782 | -38.8805 |
| Liolaemus | Fitzingerii | *L. mapuche* | -69.7694 | -38.8808 |
| Liolaemus | Fitzingerii | *L. mapuche* | -69.7863 | -38.8835 |
| Liolaemus | Fitzingerii | *L. mapuche* | -69.7735 | -38.8852 |
| Liolaemus | Fitzingerii | *L. mapuche* | -69.7819 | -38.886 |
| Liolaemus | Fitzingerii | *L. mapuche* | -69.7635 | -38.8861 |
| Liolaemus | Fitzingerii | *L. mapuche* | -69.7754 | -38.8861 |
| Liolaemus | Fitzingerii | *L. mapuche* | -69.787 | -38.8884 |
| Liolaemus | Fitzingerii | *L. mapuche* | -69.7727 | -38.8905 |
| Liolaemus | Fitzingerii | *L. mapuche* | -69.7872 | -38.8944 |
| Liolaemus | Fitzingerii | *L. mapuche* | -69.7708 | -38.8954 |
| Liolaemus | Fitzingerii | *L. mapuche* | -69.713 | -38.912 |
| Liolaemus | Fitzingerii | *L. mapuche* | -69.6936 | -38.9202 |
| Liolaemus | Fitzingerii | *L. mapuche* | -69.7116 | -38.9218 |
| Liolaemus | Fitzingerii | *L. mapuche* | -69.6935 | -38.9226 |
| Liolaemus | Fitzingerii | *L. mapuche* | -69.687 | -38.9276 |
| Liolaemus | Fitzingerii | *L. mapuche* | -69.687 | -38.9276 |
| Liolaemus | Fitzingerii | *L. mapuche* | -69.6698 | -38.928 |
| Liolaemus | Fitzingerii | *L. mapuche* | -69.6775 | -38.9282 |
| Liolaemus | Fitzingerii | *L. mapuche* | -69.6866 | -38.9399 |
| Liolaemus | Fitzingerii | *L. mapuche* | -69.6642 | -38.9417 |
| Liolaemus | Fitzingerii | *L. mapuche* | -69.6645 | -38.9475 |
| Liolaemus | Fitzingerii | *L. mapuche* | -70.1937 | -39.0369 |
| Liolaemus | Fitzingerii | *L. mapuche* | -70.0075 | -39.0863 |
| Liolaemus | Fitzingerii | *L. mapuche* | -70.0023 | -39.0884 |
| Liolaemus | Fitzingerii | *L. mapuche* | -70.0276 | -39.1222 |
| Liolaemus | Fitzingerii | *L. mapuche* | -70.011 | -39.1238 |
| Liolaemus | Fitzingerii | *L. mapuche* | -70.0197 | -39.1276 |
| Liolaemus | Fitzingerii | *L. mapuche* | -70.0338 | -39.1285 |
| Liolaemus | Fitzingerii | *L. mapuche* | -70.0144 | -39.129 |
| Liolaemus | Fitzingerii | *L. mapuche* | -70.0322 | -39.1332 |
| Liolaemus | Fitzingerii | *L. morenoi* | -70.1705 | -38.807 |
| Liolaemus | Fitzingerii | *L. morenoi* | -70.1662 | -38.8111 |
| Liolaemus | Fitzingerii | *L. morenoi* | -70.186 | -39.0252 |
| Liolaemus | Fitzingerii | *L. morenoi* | -70.1937 | -39.0369 |
| Liolaemus | Fitzingerii | *L. morenoi* | -70.2098 | -39.0394 |
| Liolaemus | Fitzingerii | *L. morenoi* | -70.195 | -39.0443 |
| Liolaemus | Fitzingerii | *L. morenoi* | -70.216 | -39.0463 |
| Liolaemus | Fitzingerii | *L. morenoi* | -70.6369 | -40.227 |
| Liolaemus | Fitzingerii | *L. morenoi* | -70.6316 | -40.2274 |
| Liolaemus | Fitzingerii | *L. morenoi* | -70.627 | -40.2304 |
| Liolaemus | Fitzingerii | *L. morenoi* | -70.6328 | -40.2307 |
| Liolaemus | Fitzingerii | *L. morenoi* | -70.6271 | -40.2347 |
| Liolaemus | Fitzingerii | *L. morenoi* | -70.6332 | -40.2347 |
| Liolaemus | Fitzingerii | *L. morenoi* | -70.6314 | -40.2393 |
| Liolaemus | Fitzingerii | *L. morenoi* | -70.6245 | -40.2397 |
| Liolaemus | Fitzingerii | *L. morenoi* | -70.6317 | -40.2419 |
| Liolaemus | Fitzingerii | *L. shehuen* | -67.5877 | -42.3661 |
| Liolaemus | Fitzingerii | *L. shehuen* | -67.5494 | -42.3728 |
| Liolaemus | Fitzingerii | *L. shehuen* | -67.6153 | -42.3744 |
| Liolaemus | Fitzingerii | *L. shehuen* | -67.5686 | -42.3752 |
| Liolaemus | Fitzingerii | *L. shehuen* | -67.5913 | -42.3768 |
| Liolaemus | Fitzingerii | *L. shehuen* | -67.5913 | -42.3768 |
| Liolaemus | Fitzingerii | *L. shehuen* | -67.5913 | -42.3768 |
| Liolaemus | Fitzingerii | *L. shehuen* | -67.5913 | -42.3768 |
| Liolaemus | Fitzingerii | *L. shehuen* | -67.5721 | -42.3811 |
| Liolaemus | Fitzingerii | *L. shehuen* | -67.5817 | -42.3852 |
| Liolaemus | Fitzingerii | *L. shehuen* | -66.9512 | -42.4388 |
| Liolaemus | Fitzingerii | *L. xanthoviridis* | -65.2974 | -43.4265 |
| Liolaemus | Fitzingerii | *L. xanthoviridis* | -65.3407 | -43.6774 |
| Liolaemus | Fitzingerii | *L. xanthoviridis* | -65.9128 | -43.749 |
| Liolaemus | Fitzingerii | *L. xanthoviridis* | -65.8766 | -43.7508 |
| Liolaemus | Fitzingerii | *L. xanthoviridis* | -65.8981 | -43.7584 |
| Liolaemus | Fitzingerii | *L. xanthoviridis* | -65.8892 | -43.7672 |
| Liolaemus | Fitzingerii | *L. xanthoviridis* | -65.9444 | -43.7859 |
| Liolaemus | Fitzingerii | *L. xanthoviridis* | -65.9295 | -43.7913 |
| Liolaemus | Fitzingerii | *L. xanthoviridis* | -65.8703 | -43.8181 |
| Liolaemus | Fitzingerii | *L. xanthoviridis* | -67.0865 | -45.0579 |
| Phymaturus | Antofagastensis | *P. antofagastensis* | -68.3313 | -27.3436 |
| Phymaturus | Antofagastensis | *P. antofagastensis* | -67.465 | -26.8752 |
| Phymaturus | Antofagastensis | *P. antofagastensis* | -67.4645 | -26.8691 |
| Phymaturus | Antofagastensis | *P. antofagastensis* | -67.4577 | -26.8721 |
| Phymaturus | Antofagastensis | *P. antofagastensis* | -67.2928 | -25.8361 |
| Phymaturus | Antofagastensis | *P. antofagastensis* | -67.2939 | -25.8346 |
| Phymaturus | Antofagastensis | *P. antofagastensis* | -67.29 | -25.8326 |
| Phymaturus | Antofagastensis | *P. antofagastensis* | -68.3313 | -27.3436 |
| Phymaturus | Antofagastensis | *P. antofagastensis* | -68.3287 | -27.3399 |
| Phymaturus | Antofagastensis | *P. antofagastensis* | -67.465 | -26.8752 |
| Phymaturus | Antofagastensis | *P. antofagastensis* | -67.4645 | -26.8663 |
| Phymaturus | Antofagastensis | *P. antofagastensis* | -67.4233 | -26.8732 |
| Phymaturus | Antofagastensis | *P. denotatus* | -66.9444 | -26.5692 |
| Phymaturus | Antofagastensis | *P. denotatus* | -66.7555 | -26.853 |
| Phymaturus | Antofagastensis | *P. denotatus* | -66.7441 | -26.857 |
| Phymaturus | Antofagastensis | *P. denotatus* | -66.7398 | -26.859 |
| Phymaturus | Antofagastensis | *P. denotatus* | -66.7345 | -26.8716 |
| Phymaturus | Antofagastensis | *P. denotatus* | -66.7403 | -26.883 |
| Phymaturus | Antofagastensis | *P. denotatus* | -66.7466 | -26.8921 |
| Phymaturus | Antofagastensis | *P. denotatus* | -66.7565 | -26.8523 |
| Phymaturus | Antofagastensis | *P. denotatus* | -66.7897 | -26.7781 |
| Phymaturus | Antofagastensis | *P. denotatus* | -66.9444 | -26.5692 |
| Phymaturus | Antofagastensis | *P. denotatus* | -66.9775 | -26.5662 |
| Phymaturus | Antofagastensis | *P. denotatus* | -66.9714 | -26.5804 |
| Phymaturus | Antofagastensis | *P. denotatus* | -66.9982 | -26.5877 |
| Phymaturus | Antofagastensis | *P. denotatus* | -66.9835 | -26.6123 |
| Phymaturus | Antofagastensis | *P. denotatus* | -66.9489 | -26.6178 |
| Phymaturus | Antofagastensis | *P. denotatus* | -66.9498 | -26.6378 |
| Phymaturus | Antofagastensis | *P. denotatus* | -66.9696 | -26.6444 |
| Phymaturus | Antofagastensis | *P. denotatus* | -66.9936 | -26.6556 |
| Phymaturus | Antofagastensis | *P. denotatus* | -66.9623 | -26.6583 |
| Phymaturus | Antofagastensis | *P. denotatus* | -66.8663 | -26.7604 |
| Phymaturus | Antofagastensis | *P. denotatus* | -66.711 | -26.4723 |
| Phymaturus | Antofagastensis | *P. denotatus* | -66.7131 | -26.4764 |
| Phymaturus | Antofagastensis | *P. denotatus* | -66.7219 | -26.4768 |
| Phymaturus | Antofagastensis | *P. denotatus* | -66.7447 | -26.4776 |
| Phymaturus | Antofagastensis | *P. denotatus* | -66.7289 | -26.4933 |
| Phymaturus | Antofagastensis | *P. denotatus* | -66.7236 | -26.5088 |
| Phymaturus | Antofagastensis | *P. denotatus* | -66.7241 | -26.6276 |
| Phymaturus | Antofagastensis | *P. denotatus* | -66.4856 | -26.6215 |
| Phymaturus | Antofagastensis | *P. denotatus* | -66.281 | -26.703 |
| Phymaturus | Antofagastensis | *P. denotatus* | -66.7166 | -26.8664 |
| Phymaturus | Antofagastensis | *P. denotatus* | -67.0464 | -27.2376 |
| Phymaturus | Antofagastensis | *P. denotatus* | -67.8359 | -26.8611 |
| Phymaturus | Antofagastensis | *P. laurenti* | -67.224 | -26.6613 |
| Phymaturus | Antofagastensis | *P. laurenti* | -67.2234 | -26.6638 |
| Phymaturus | Antofagastensis | *P. laurenti* | -67.2239 | -26.6648 |
| Phymaturus | Antofagastensis | *P. laurenti* | -67.2233 | -26.6654 |
| Phymaturus | Antofagastensis | *P. laurenti* | -67.2234 | -26.6664 |
| Phymaturus | Antofagastensis | *P. laurenti* | -67.2227 | -26.6673 |
| Phymaturus | Antofagastensis | *P. laurenti* | -67.2212 | -26.6628 |
| Phymaturus | Antofagastensis | *P. laurenti* | -67.2264 | -26.6731 |
| Phymaturus | Antofagastensis | *P. laurenti* | -67.209 | -26.6589 |
| Phymaturus | Antofagastensis | *P. laurenti* | -67.2079 | -26.6416 |
| Phymaturus | Antofagastensis | *P. laurenti* | -67.2013 | -26.6291 |
| Phymaturus | Antofagastensis | *P. laurenti* | -67.1896 | -26.6709 |
| Phymaturus | Antofagastensis | *P. laurenti* | -67.2316 | -25.635 |
| Phymaturus | Antofagastensis | *P. laurenti* | -67.2288 | -25.6372 |
| Phymaturus | Antofagastensis | *P. laurenti* | -67.2302 | -25.6355 |
| Phymaturus | Antofagastensis | *P. laurenti* | -67.1338 | -26.3414 |
| Phymaturus | Antofagastensis | *P. laurenti* | -67.3153 | -25.8539 |
| Phymaturus | Antofagastensis | *P. laurenti* | -67.3182 | -25.8566 |
| Phymaturus | Antofagastensis | *P. laurenti* | -67.3086 | -25.8538 |
| Phymaturus | Antofagastensis | *P. laurenti* | -67.3177 | -25.8597 |
| Phymaturus | Antofagastensis | *P. laurenti* | -67.3224 | -25.8618 |
| Phymaturus | Antofagastensis | *P. laurenti* | -67.323 | -25.8641 |
| Phymaturus | Antofagastensis | *P. laurenti* | -67.3242 | -25.867 |
| Phymaturus | Antofagastensis | *P. laurenti* | -67.3284 | -25.8676 |
| Phymaturus | Antofagastensis | *P. laurenti* | -67.3279 | -25.8714 |
| Phymaturus | Antofagastensis | *P. laurenti* | -66.7333 | -26.85 |
| Phymaturus | Antofagastensis | *P. laurenti* | -67.224 | -26.6612 |
| Phymaturus | Antofagastensis | *P. laurenti* | -67.2234 | -26.6661 |
| Phymaturus | Antofagastensis | *P. laurenti* | -67.221 | -26.6618 |
| Phymaturus | Antofagastensis | *P. laurenti* | -67.2263 | -26.6727 |
| Phymaturus | Antofagastensis | *P. laurenti* | -67.1934 | -26.6718 |
| Phymaturus | Antofagastensis | *P. laurenti* | -67.2088 | -26.6637 |
| Phymaturus | Antofagastensis | *P. laurenti* | -67.2043 | -26.6464 |
| Phymaturus | Antofagastensis | *P. laurenti* | -67.2028 | -26.6294 |
| Phymaturus | Antofagastensis | *P. laurenti* | -67.2018 | -26.6185 |
| Phymaturus | Antofagastensis | *P. laurenti* | -67.1857 | -26.6049 |
| Phymaturus | Antofagastensis | *P. laurenti* | -67.184 | -26.6652 |
| Phymaturus | Antofagastensis | *P. laurenti* | -67.2755 | -26.6892 |
| Phymaturus | Antofagastensis | *P. laurenti* | -67.2304 | -25.6353 |
| Phymaturus | Antofagastensis | *P. laurenti* | -67.2262 | -25.6159 |
| Phymaturus | Antofagastensis | *P. laurenti* | -67.2268 | -25.6123 |
| Phymaturus | Antofagastensis | *P. laurenti* | -67.1328 | -26.3419 |
| Phymaturus | Antofagastensis | *P. laurenti* | -67.3143 | -25.8545 |
| Phymaturus | Antofagastensis | *P. laurenti* | -67.3164 | -25.8512 |
| Phymaturus | Antofagastensis | *P. laurenti* | -67.3155 | -25.8542 |
| Phymaturus | Antofagastensis | *P. laurenti* | -67.3112 | -25.8517 |
| Phymaturus | Antofagastensis | *P. laurenti* | -67.3084 | -25.854 |
| Phymaturus | Antofagastensis | *P. laurenti* | -67.3133 | -25.8582 |
| Phymaturus | Antofagastensis | *P. laurenti* | -67.3156 | -25.8607 |
| Phymaturus | Antofagastensis | *P. laurenti* | -67.3192 | -25.8643 |
| Phymaturus | Antofagastensis | *P. laurenti* | -67.3226 | -25.8682 |
| Phymaturus | Antofagastensis | *P. laurenti* | -66.7333 | -26.85 |
| Phymaturus | Antofagastensis | *P. laurenti* | -66.7294 | -26.4671 |
| Phymaturus | Antofagastensis | *P. laurenti* | -66.7253 | -26.4705 |
| Phymaturus | Antofagastensis | *P. laurenti* | -66.7237 | -26.4743 |
| Phymaturus | Antofagastensis | *P. laurenti* | -66.7406 | -26.8678 |
| Phymaturus | Antofagastensis | *P. laurenti* | -66.7341 | -26.8726 |
| Phymaturus | Palluma | *P. bibroni* | -70.3833 | -30.3833 |
| Phymaturus | Palluma | *P. bibroni* | -70.3823 | -30.3805 |
| Phymaturus | Palluma | *P. bibroni* | -70.3822 | -30.379 |
| Phymaturus | Palluma | *P. bibroni* | -70.3822 | -30.3767 |
| Phymaturus | Palluma | *P. bibroni* | -70.3383 | -30.7375 |
| Phymaturus | Palluma | *P. bibroni* | -70.3322 | -30.7328 |
| Phymaturus | Palluma | *P. bibroni* | -70.3316 | -30.737 |
| Phymaturus | Palluma | *P. bibroni* | -70.3274 | -30.7331 |
| Phymaturus | Palluma | *P. bibroni* | -70.325 | -30.7322 |
| Phymaturus | Palluma | *P. maulense* | -70.9737 | -35.5872 |
| Phymaturus | Palluma | *P. maulense* | -70.9712 | -35.5868 |
| Phymaturus | Palluma | *P. maulense* | -70.9691 | -35.5835 |
| Phymaturus | Palluma | *P. maulense* | -70.9671 | -35.5803 |
| Phymaturus | Palluma | *P. maulense* | -70.9667 | -35.5833 |
| Phymaturus | Palluma | *P. maulense* | -70.9661 | -35.5876 |
| Phymaturus | Palluma | *P. maulense* | -70.9652 | -35.5853 |
| Phymaturus | Palluma | *P. maulense* | -70.9648 | -35.5819 |
| Phymaturus | Palluma | *P. maulense* | -70.5667 | -35.95 |
| Phymaturus | Palluma | *P. palluma* | -70.5892 | -36.0335 |
| Phymaturus | Palluma | *P. palluma* | -70.5833 | -36.0333 |
| Phymaturus | Palluma | *P. palluma* | -70.5816 | -36.0309 |
| Phymaturus | Palluma | *P. palluma* | -70.3847 | -33.3296 |
| Phymaturus | Palluma | *P. palluma* | -70.3833 | -33.3333 |
| Phymaturus | Palluma | *P. palluma* | -70.38 | -33.3322 |
| Phymaturus | Palluma | *P. palluma* | -70.25 | -35.3333 |
| Phymaturus | Palluma | *P. palluma* | -70.1667 | -35.1833 |
| Phymaturus | Palluma | *P. palluma* | -69.8513 | -33.3496 |
| Phymaturus | Palluma | *P. palluma* | -69.85 | -33.35 |
| Phymaturus | Palluma | *P. palluma* | -69.8479 | -33.3497 |
| Phymaturus | Palluma | *P. palluma* | -69.8461 | -33.3505 |
| Phymaturus | Palluma | *P. palluma* | -69.5067 | -34.4349 |
| Phymaturus | Palluma | *P. palluma* | -69.5039 | -34.4327 |
| Phymaturus | Palluma | *P. palluma* | -69.5 | -34.4333 |
| Phymaturus | Palluma | *P. palluma* | -69.4992 | -34.4308 |
| Phymaturus | Palluma | *P. palluma* | -69.4958 | -33.6146 |
| Phymaturus | Palluma | *P. palluma* | -69.488 | -33.6149 |
| Phymaturus | Palluma | *P. palluma* | -69.4847 | -33.6137 |
| Phymaturus | Palluma | *P. palluma* | -69.4803 | -33.6139 |
| Phymaturus | Palluma | *P. palluma* | -69.4785 | -33.611 |
| Phymaturus | Palluma | *P. palluma* | -69.4754 | -33.6107 |
| Phymaturus | Palluma | *P. palluma* | -69.4707 | -33.6115 |
| Phymaturus | Palluma | *P. palluma* | -69.469 | -33.6095 |
| Phymaturus | Palluma | *P. palluma* | -69.4455 | -34.2264 |
| Phymaturus | Palluma | *P. palluma* | -69.435 | -34.2215 |
| Phymaturus | Palluma | *P. palluma* | -69.4301 | -34.2233 |
| Phymaturus | Palluma | *P. palluma* | -69.4191 | -34.2315 |
| Phymaturus | Palluma | *P. palluma* | -69.4137 | -34.2342 |
| Phymaturus | Palluma | *P. palluma* | -69.4113 | -34.2347 |
| Phymaturus | Palluma | *P. palluma* | -69.4093 | -34.238 |
| Phymaturus | Palluma | *P. palluma* | -69.401 | -34.2411 |
| Phymaturus | Palluma | *P. palluma* | -69.4 | -34.2427 |
| Phymaturus | Palluma | *P. palluma* | -69.3962 | -34.2404 |
| Phymaturus | Palluma | *P. palluma* | -69.395 | -34.2438 |
| Phymaturus | Palluma | *P. palluma* | -69.3943 | -34.2434 |
| Phymaturus | Palluma | *P. palluma* | -69.3333 | -32.9833 |
| Phymaturus | Palluma | *P. querque* | -70.5606 | -38.8643 |
| Phymaturus | Palluma | *P. querque* | -70.5524 | -38.8613 |
| Phymaturus | Palluma | *P. querque* | -70.5451 | -38.8611 |
| Phymaturus | Palluma | *P. querque* | -70.5448 | -38.8591 |
| Phymaturus | Palluma | *P. querque* | -70.5442 | -38.8609 |
| Phymaturus | Palluma | *P. querque* | -70.5418 | -38.8604 |
| Phymaturus | Palluma | *P. querque* | -70.5395 | -38.8588 |
| Phymaturus | Palluma | *P. querque* | -70.5375 | -38.8617 |
| Phymaturus | Palluma | *P. querque* | -70.5371 | -38.8587 |
| Phymaturus | Palluma | *P. querque* | -70.5362 | -38.8599 |
| Phymaturus | Palluma | *P. querque* | -70.43 | -39.1317 |
| Phymaturus | Palluma | *P. querque* | -70.4294 | -39.134 |
| Phymaturus | Palluma | *P. querque* | -70.4286 | -39.135 |
| Phymaturus | Palluma | *P. querque* | -70.4284 | -39.1311 |
| Phymaturus | Palluma | *P. querque* | -70.4258 | -39.1398 |
| Phymaturus | Palluma | *P. querque* | -70.4247 | -39.1347 |
| Phymaturus | Palluma | *P. querque* | -70.4207 | -39.1382 |
| Phymaturus | Palluma | *P. querque* | -70.4185 | -39.131 |
| Phymaturus | Palluma | *P. querque* | -70.4181 | -39.1313 |
| Phymaturus | Palluma | *P. querque* | -70.4178 | -39.1388 |
| Phymaturus | Palluma | *P. querque* | -70.4167 | -39.1334 |
| Phymaturus | Palluma | *P. querque* | -70.41 | -39.1256 |
| Phymaturus | Palluma | *P. querque* | -70.4028 | -39.1244 |
| Phymaturus | Palluma | *P. querque* | -70.4012 | -39.1219 |
| Phymaturus | Palluma | *P. roigorum* | -69.3923 | -36.493 |
| Phymaturus | Palluma | *P. roigorum* | -69.3847 | -36.4686 |
| Phymaturus | Palluma | *P. roigorum* | -69.382 | -36.4873 |
| Phymaturus | Palluma | *P. roigorum* | -69.3816 | -36.4948 |
| Phymaturus | Palluma | *P. roigorum* | -69.3803 | -36.4615 |
| Phymaturus | Palluma | *P. roigorum* | -69.3744 | -36.4809 |
| Phymaturus | Palluma | *P. roigorum* | -69.3704 | -36.4842 |
| Phymaturus | Palluma | *P. roigorum* | -69.3667 | -36.4833 |
| Phymaturus | Palluma | *P. roigorum* | -69.3667 | -36.3333 |
| Phymaturus | Palluma | *P. roigorum* | -69.2667 | -36.65 |
| Phymaturus | Palluma | *P. roigorum* | -69.2405 | -36.3491 |
| Phymaturus | Patagonicus | *P. ceii* | -68.9806 | -40.3464 |
| Phymaturus | Patagonicus | *P. ceii* | -68.9878 | -40.3431 |
| Phymaturus | Patagonicus | *P. ceii* | -68.9938 | -40.3655 |
| Phymaturus | Patagonicus | *P. ceii* | -68.9931 | -40.3659 |
| Phymaturus | Patagonicus | *P. ceii* | -69.0111 | -40.3333 |
| Phymaturus | Patagonicus | *P. ceii* | -68.4519 | -40.2838 |
| Phymaturus | Patagonicus | *P. ceii* | -68.4628 | -40.2883 |
| Phymaturus | Patagonicus | *P. ceii* | -68.4671 | -40.2918 |
| Phymaturus | Patagonicus | *P. ceii* | -68.4676 | -40.2944 |
| Phymaturus | Patagonicus | *P. ceii* | -68.4722 | -40.2939 |
| Phymaturus | Patagonicus | *P. ceii* | -68.4767 | -40.2965 |
| Phymaturus | Patagonicus | *P. ceii* | -68.481 | -40.2981 |
| Phymaturus | Patagonicus | *P. ceii* | -68.4776 | -40.2998 |
| Phymaturus | Patagonicus | *P. ceii* | -68.4904 | -40.2948 |
| Phymaturus | Patagonicus | *P. ceii* | -68.4943 | -40.2927 |
| Phymaturus | Patagonicus | *P. ceii* | -69.1501 | -40.7334 |
| Phymaturus | Patagonicus | *P. ceii* | -69.1527 | -40.7386 |
| Phymaturus | Patagonicus | *P. ceii* | -69.1538 | -40.7457 |
| Phymaturus | Patagonicus | *P. ceii* | -69.1429 | -40.7437 |
| Phymaturus | Patagonicus | *P. ceii* | -69.1659 | -40.7251 |
| Phymaturus | Patagonicus | *P. ceii* | -68.9167 | -40.2833 |
| Phymaturus | Patagonicus | *P. ceii* | -68.911 | -40.2733 |
| Phymaturus | Patagonicus | *P. ceii* | -68.9312 | -40.2746 |
| Phymaturus | Patagonicus | *P. ceii* | -68.923 | -40.2689 |
| Phymaturus | Patagonicus | *P. ceii* | -68.9112 | -40.251 |
| Phymaturus | Patagonicus | *P. ceii* | -68.9056 | -40.2412 |
| Phymaturus | Patagonicus | *P. ceii* | -68.4624 | -40.2873 |
| Phymaturus | Patagonicus | *P. ceii* | -69.0093 | -40.3839 |
| Phymaturus | Patagonicus | *P. ceii* | -68.9917 | -40.3901 |
| Phymaturus | Patagonicus | *P. nevadoi* | -68.5435 | -35.9291 |
| Phymaturus | Patagonicus | *P. nevadoi* | -68.5491 | -35.9459 |
| Phymaturus | Patagonicus | *P. nevadoi* | -68.5457 | -35.949 |
| Phymaturus | Patagonicus | *P. nevadoi* | -68.5573 | -35.9298 |
| Phymaturus | Patagonicus | *P. nevadoi* | -68.6138 | -35.9186 |
| Phymaturus | Patagonicus | *P. nevadoi* | -68.6836 | -35.8783 |
| Phymaturus | Patagonicus | *P. nevadoi* | -68.6 | -35.9167 |
| Phymaturus | Patagonicus | *P. nevadoi* | -68.6112 | -35.919 |
| Phymaturus | Patagonicus | *P. nevadoi* | -68.6173 | -35.9143 |
| Phymaturus | Patagonicus | *P. nevadoi* | -68.6225 | -35.9117 |
| Phymaturus | Patagonicus | *P. nevadoi* | -68.6294 | -35.9013 |
| Phymaturus | Patagonicus | *P. nevadoi* | -68.6355 | -35.897 |
| Phymaturus | Patagonicus | *P. nevadoi* | -68.6389 | -35.8943 |
| Phymaturus | Patagonicus | *P. nevadoi* | -68.6669 | -35.8926 |
| Phymaturus | Patagonicus | *P. nevadoi* | -68.6836 | -35.8782 |
| Phymaturus | Patagonicus | *P. nevadoi* | -69.8403 | -35.73 |
| Phymaturus | Patagonicus | *P. nevadoi* | -69.8392 | -35.7294 |
| Phymaturus | Patagonicus | *P. nevadoi* | -69.8422 | -35.7298 |
| Phymaturus | Patagonicus | *P. nevadoi* | -69.8422 | -35.7305 |
| Phymaturus | Patagonicus | *P. nevadoi* | -69.843 | -35.7295 |
| Phymaturus | Patagonicus | *P. nevadoi* | -69.8403 | -35.7261 |
| Phymaturus | Patagonicus | *P. nevadoi* | -69.8405 | -35.7256 |
| Phymaturus | Patagonicus | *P. nevadoi* | -69.8414 | -35.7261 |
| Phymaturus | Patagonicus | *P. patagonicus* | -66.1167 | -43.45 |
| Phymaturus | Patagonicus | *P. patagonicus* | -66.1379 | -43.4784 |
| Phymaturus | Patagonicus | *P. patagonicus* | -66.1227 | -43.4523 |
| Phymaturus | Patagonicus | *P. patagonicus* | -66.072 | -43.4678 |
| Phymaturus | Patagonicus | *P. patagonicus* | -65.9683 | -43.4185 |
| Phymaturus | Patagonicus | *P. patagonicus* | -65.9913 | -43.4273 |
| Phymaturus | Patagonicus | *P. patagonicus* | -65.9167 | -43.45 |
| Phymaturus | Patagonicus | *P. patagonicus* | -71.0867 | -37.8206 |
| Phymaturus | Patagonicus | *P. patagonicus* | -71.0849 | -37.821 |
| Phymaturus | Patagonicus | *P. patagonicus* | -71.0832 | -37.8221 |
| Phymaturus | Patagonicus | *P. patagonicus* | -71.0823 | -37.8251 |
| Phymaturus | Patagonicus | *P. patagonicus* | -71.0775 | -37.8213 |
| Phymaturus | Patagonicus | *P. patagonicus* | -71.09 | -37.8058 |
| Phymaturus | Patagonicus | *P. patagonicus* | -66.1167 | -43.45 |
| Phymaturus | Patagonicus | *P. patagonicus* | -66.1307 | -43.4528 |
| Phymaturus | Patagonicus | *P. patagonicus* | -66.1094 | -43.4491 |
| Phymaturus | Patagonicus | *P. patagonicus* | -66.0339 | -43.475 |
| Phymaturus | Patagonicus | *P. patagonicus* | -66.0154 | -43.4556 |
| Phymaturus | Patagonicus | *P. patagonicus* | -65.9947 | -43.426 |
| Phymaturus | Patagonicus | *P. payuniae* | -69.2697 | -36.6724 |
| Phymaturus | Patagonicus | *P. payuniae* | -69.2643 | -36.6622 |
| Phymaturus | Patagonicus | *P. payuniae* | -69.2644 | -36.6648 |
| Phymaturus | Patagonicus | *P. payuniae* | -69.2667 | -36.6674 |
| Phymaturus | Patagonicus | *P. payuniae* | -69.2656 | -36.6678 |
| Phymaturus | Patagonicus | *P. payuniae* | -69.2653 | -36.67 |
| Phymaturus | Patagonicus | *P. payuniae* | -69.2669 | -36.6702 |
| Phymaturus | Patagonicus | *P. payuniae* | -69.2806 | -36.6649 |
| Phymaturus | Patagonicus | *P. payuniae* | -69.2803 | -36.6643 |
| Phymaturus | Patagonicus | *P. payuniae* | -69.2806 | -36.663 |
| Phymaturus | Patagonicus | *P. payuniae* | -69.2806 | -36.6616 |
| Phymaturus | Patagonicus | *P. payuniae* | -69.2813 | -36.6601 |
| Phymaturus | Patagonicus | *P. payuniae* | -69.282 | -36.6581 |
| Phymaturus | Patagonicus | *P. payuniae* | -69.2803 | -36.6602 |
| Phymaturus | Patagonicus | *P. payuniae* | -69.2828 | -36.6551 |
| Phymaturus | Patagonicus | *P. payuniae* | -69.2827 | -36.6578 |
| Phymaturus | Patagonicus | *P. payuniae* | -69.3667 | -36.4833 |
| Phymaturus | Patagonicus | *P. payuniae* | -69.3705 | -36.4841 |
| Phymaturus | Patagonicus | *P. payuniae* | -69.3728 | -36.4796 |
| Phymaturus | Patagonicus | *P. payuniae* | -68.914 | -36.7243 |
| Phymaturus | Patagonicus | *P. payuniae* | -68.9232 | -36.7378 |
| Phymaturus | Patagonicus | *P. payuniae* | -68.9385 | -36.7384 |
| Phymaturus | Patagonicus | *P. payuniae* | -68.9812 | -36.4956 |
| Phymaturus | Patagonicus | *P. payuniae* | -68.9843 | -36.4966 |
| Phymaturus | Patagonicus | *P. payuniae* | -68.9734 | -36.497 |
| Phymaturus | Patagonicus | *P. payuniae* | -69.2493 | -36.3594 |
| Phymaturus | Patagonicus | *P. payuniae* | -69.24 | -36.35 |
| Phymaturus | Patagonicus | *P. payuniae* | -69.2417 | -36.3509 |
| Phymaturus | Patagonicus | *P. payuniae* | -69.2414 | -36.3529 |
| Phymaturus | Patagonicus | *P. payuniae* | -69.2429 | -36.3549 |
| Phymaturus | Patagonicus | *P. payuniae* | -69.2438 | -36.356 |
| Phymaturus | Patagonicus | *P. payuniae* | -69.244 | -36.3568 |
| Phymaturus | Patagonicus | *P. payuniae* | -69.2439 | -36.3584 |
| Phymaturus | Patagonicus | *P. payuniae* | -69.2451 | -36.3614 |
| Phymaturus | Patagonicus | *P. payuniae* | -69.2446 | -36.3631 |
| Phymaturus | Patagonicus | *P. payuniae* | -69.37 | -36.48 |
| Phymaturus | Patagonicus | *P. payuniae* | -69.37 | -36.4843 |
| Phymaturus | Patagonicus | *P. payuniae* | -69.37 | -36.49 |
| Phymaturus | Patagonicus | *P. payuniae* | -69.3676 | -36.4908 |
| Phymaturus | Patagonicus | *P. payuniae* | -69.3596 | -36.487 |
| Phymaturus | Patagonicus | *P. payuniae* | -69.3572 | -36.4909 |
| Phymaturus | Patagonicus | *P. payuniae* | -69.353 | -36.4787 |
| Phymaturus | Patagonicus | *P. payuniae* | -69.37 | -36.5497 |
| Phymaturus | Patagonicus | *P. payuniae* | -69.3633 | -36.5518 |
| Phymaturus | Patagonicus | *P. somuncurensis* | -66.8893 | -41.2039 |
| Phymaturus | Patagonicus | *P. somuncurensis* | -66.95 | -41.3833 |
| Phymaturus | Patagonicus | *P. somuncurensis* | -66.9525 | -41.3888 |
| Phymaturus | Patagonicus | *P. somuncurensis* | -66.9512 | -41.3926 |
| Phymaturus | Patagonicus | *P. somuncurensis* | -66.9587 | -41.3842 |
| Phymaturus | Patagonicus | *P. somuncurensis* | -66.9717 | -41.3853 |
| Phymaturus | Patagonicus | *P. somuncurensis* | -66.9752 | -41.3904 |
| Phymaturus | Patagonicus | *P. somuncurensis* | -66.8817 | -41.1844 |
| Phymaturus | Patagonicus | *P. somuncurensis* | -66.8722 | -41.1767 |
| Phymaturus | Patagonicus | *P. somuncurensis* | -66.868 | -41.1764 |
| Phymaturus | Patagonicus | *P. somuncurensis* | -66.8695 | -41.1725 |
| Phymaturus | Patagonicus | *P. somuncurensis* | -67.0115 | -41.5176 |
| Phymaturus | Patagonicus | *P. somuncurensis* | -67.0065 | -41.5204 |
| Phymaturus | Patagonicus | *P. somuncurensis* | -67.0074 | -41.5237 |
| Phymaturus | Patagonicus | *P. somuncurensis* | -67.0071 | -41.5264 |
| Phymaturus | Patagonicus | *P. somuncurensis* | -66.9807 | -41.4205 |
| Phymaturus | Patagonicus | *P. somuncurensis* | -66.982 | -41.4222 |
| Phymaturus | Patagonicus | *P. spurcus* | -69.8 | -41.35 |
| Phymaturus | Patagonicus | *P. spurcus* | -69.8057 | -41.3513 |
| Phymaturus | Patagonicus | *P. spurcus* | -69.8079 | -41.3409 |
| Phymaturus | Patagonicus | *P. spurcus* | -70.6693 | -41.5508 |
| Phymaturus | Patagonicus | *P. spurcus* | -70.6757 | -41.5634 |
| Phymaturus | Patagonicus | *P. spurcus* | -70.6344 | -41.5678 |
| Phymaturus | Patagonicus | *P. spurcus* | -70.6199 | -41.5635 |
| Phymaturus | Patagonicus | *P. spurcus* | -70.5909 | -41.5534 |
| Phymaturus | Patagonicus | *P. spurcus* | -69.85 | -41.5333 |
| Phymaturus | Patagonicus | *P. spurcus* | -69.8587 | -41.5454 |
| Phymaturus | Patagonicus | *P. spurcus* | -69.92 | -41.29 |
| Phymaturus | Patagonicus | *P. spurcus* | -69.93 | -41.2924 |
| Phymaturus | Patagonicus | *P. spurcus* | -69.9343 | -41.304 |
| Phymaturus | Patagonicus | *P. spurcus* | -69.9614 | -41.2861 |
| Phymaturus | Patagonicus | *P. spurcus* | -69.9277 | -41.2701 |
| Phymaturus | Patagonicus | *P. zapalensis* | -70.3644 | -39.3422 |
| Phymaturus | Patagonicus | *P. zapalensis* | -70.4301 | -39.1317 |
| Phymaturus | Patagonicus | *P. zapalensis* | -70.4202 | -39.1377 |
| Phymaturus | Patagonicus | *P. zapalensis* | -70.4183 | -39.1386 |
| Phymaturus | Patagonicus | *P. zapalensis* | -70.4162 | -39.1382 |
| Phymaturus | Patagonicus | *P. zapalensis* | -70.4328 | -39.1447 |
| Phymaturus | Patagonicus | *P. zapalensis* | -70.4365 | -39.1444 |
| Phymaturus | Patagonicus | *P. zapalensis* | -70.4076 | -39.126 |
| Phymaturus | Patagonicus | *P. zapalensis* | -70.3948 | -39.1218 |
| Phymaturus | Patagonicus | *P. zapalensis* | -70.6391 | -39.8155 |
| Phymaturus | Patagonicus | *P. zapalensis* | -70.6157 | -39.6765 |
| Phymaturus | Patagonicus | *P. zapalensis* | -70.6192 | -39.6753 |
| Phymaturus | Patagonicus | *P. zapalensis* | -70.6319 | -39.6768 |

**References from which some localities were extracted.**

Ávila, L.J., Morando, M. & Sites Jr., J.W. 2008. New species of the iguanian lizard genus Liolaemus (Squamata, Iguania, Liolaemini) from central Patagonia, Argentina. Journal of Herpetology 42: 186-196.

Pérez CHF, Frutos N, Kozykariski M, Morando M, Perez DR, Avila LJ, 2011) Lizards of Rio Negro Province, northern Patagonia, Argentina. Check List 7: 202–219.

Abdala, C. S. & Juárez, V. 2013. Taxonomía y filogenia de un grupo de lagartos amenzados: el grupo de Liolaemus anomalus (Iguania: Liolaemidae). Cuadernos de Herpetología 27: 109-153.

Avila, L., Pérez, C.H.F., and  Cacciali, P. 2015.  New record of Liolaemus ditadai Cei, 1983 (Squamata, Liolaemidae) from Santiago del Estero province, Argentina.  Check List 11(4): 1710

Lobo, F. Barrasso, D.A., Paz, M.M. and Basso, N.G. 2018.  Phylogenetic relationships within a patagonian clade ofreptiles (Liolaemidae: Phymaturus) based on DNA sequencesand morphology. J Zool Syst Evol Res.1-21

Morando, M.; Avila, L.J.; Perez, C.H.F.; Hawkins, M.A. & Sites, Jr., J.W. 2013. A molecular phylogeny of the lizard genus Phymaturus (Squamata, Liolaemini): Implications for species diversity and historical biogeography of southern South America. Molecular Phylogenetics and Evolution 66: 694-714.

Troncoso-Palacios, J., Ferri-Yañez, F., Laspiur, A. and Aguilar, C. 2018. An updated phylogeny and morphological study of the Phymaturus vociferator clade (Iguania: Liolaemidae). Zootaxa 4441 (3): 447–466.
